# Supplementary material for: Comprehensive mitogenomic insights into Hemibagrus velox endemic to Sumatra, Indonesia and its phylogenetic relationships within the Bagridae lineage
Source: Research Square preprint supplement (doi:10.21203/rs.3.rs-7017369/v1), 2025-07-02
Supplement: Supplementary file 1 [file 6fafcff5cd21fe447126d449.docx]

**Electronic supplementary material**

**
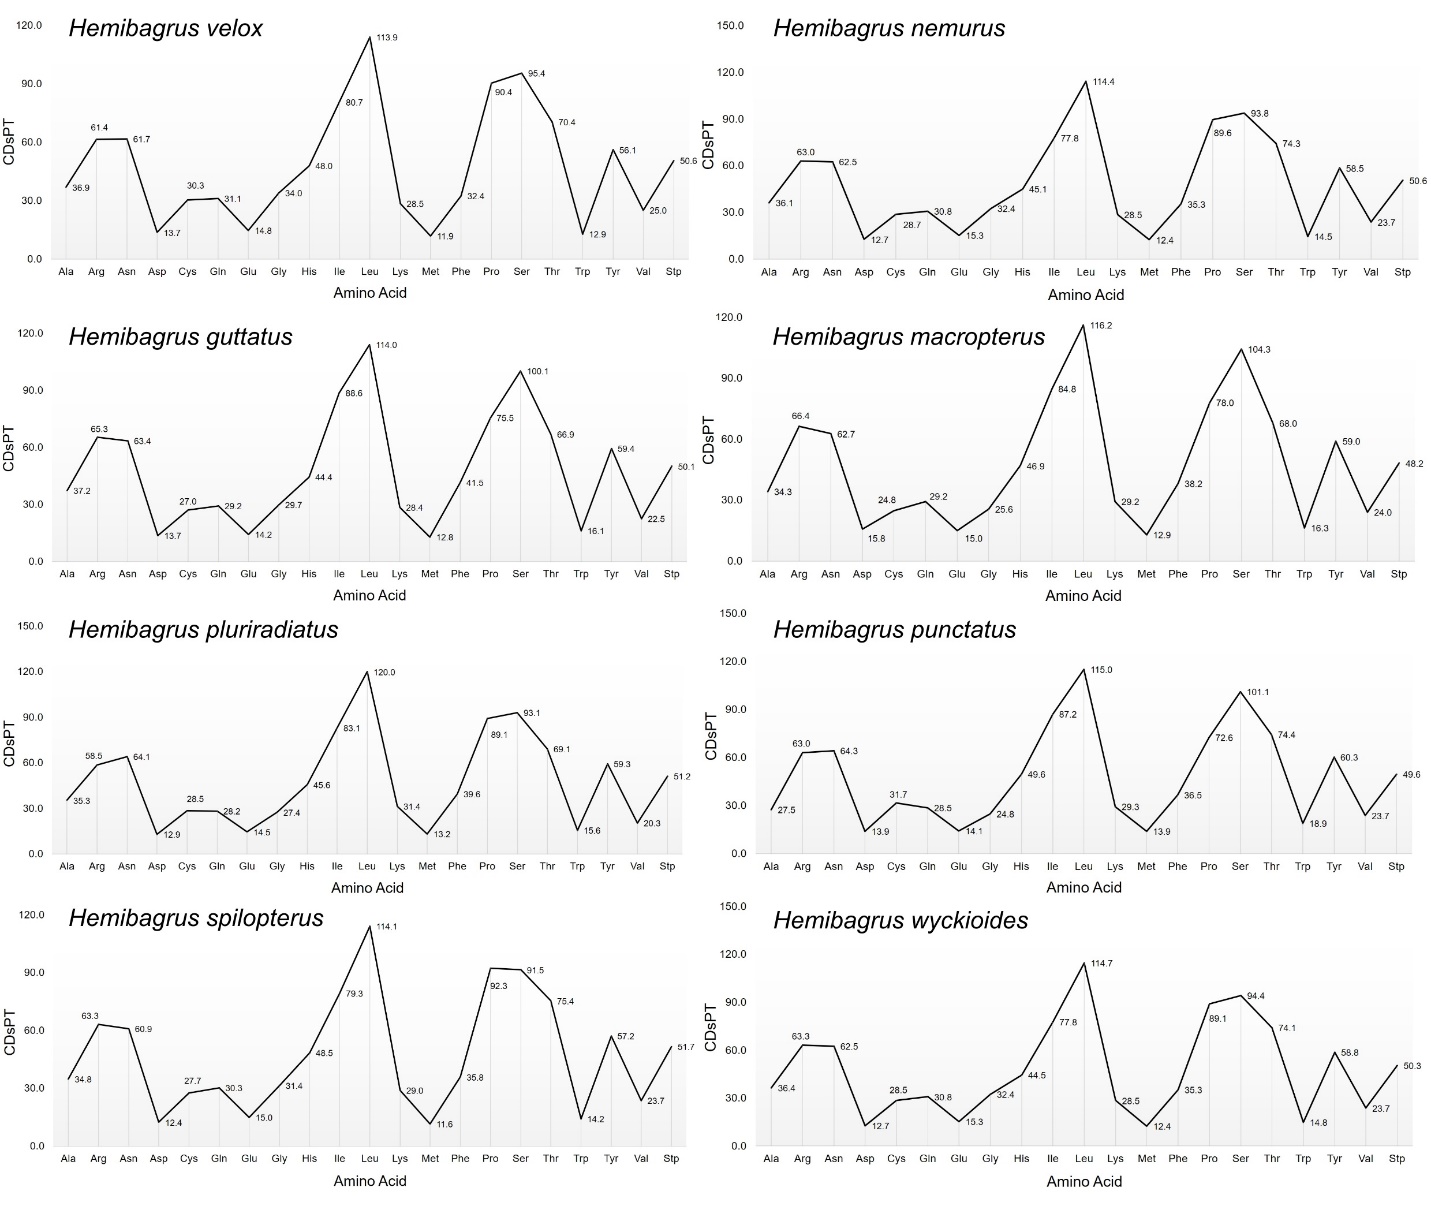
**

**Supplementary Fig. 1** Codon distribution per thousand codons for all amino acids in the mitogenomes of *H. velox* and seven other *Hemibagrus* congeners.


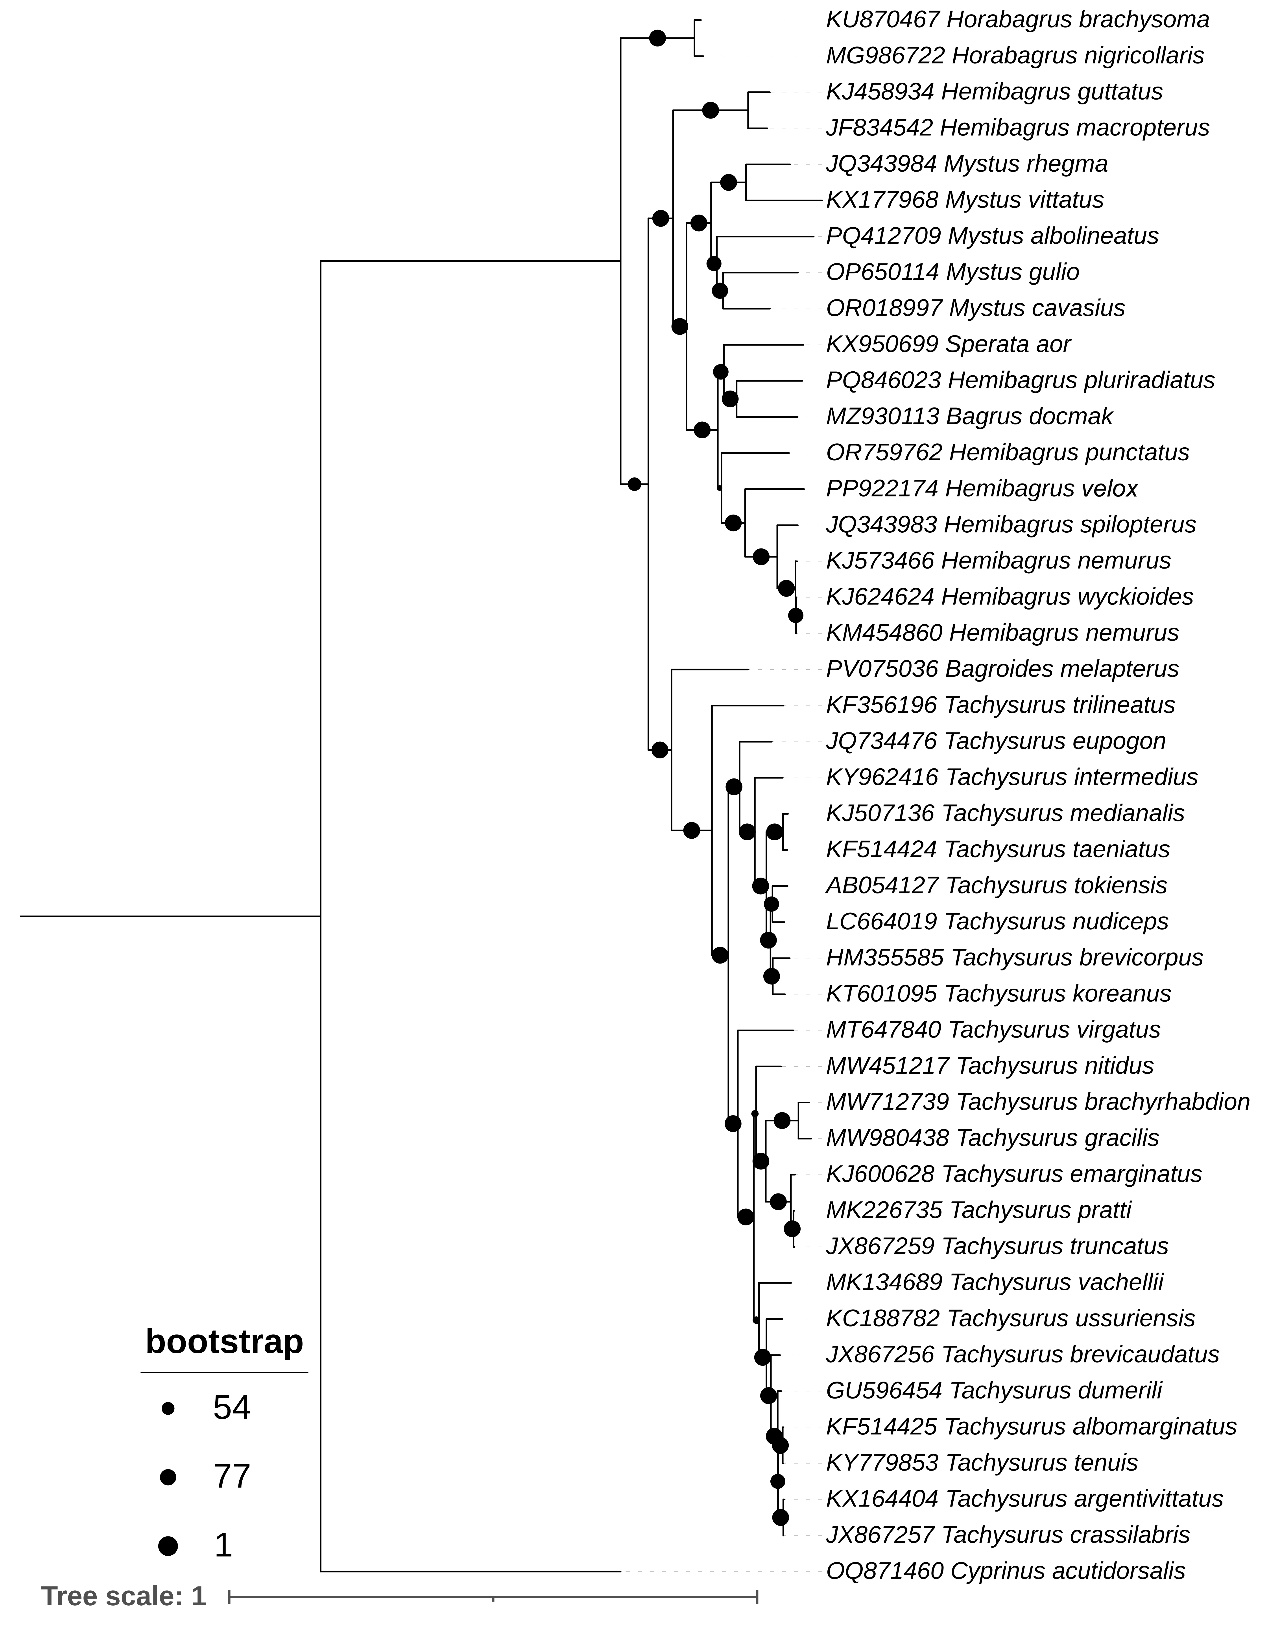


**Supplementary Fig. 2** The Maximum Likelihood (ML) phylogenetic tree, constructed using concatenated sequences of 13 PCGs, clearly resolves the newly sequenced *H. velox* as distinct from other species within the family Bagridae. The bootstrap values derived from ML analysis, indicated in dark blue at each node, represent the statistical support for the inferred phylogenetic relationships.


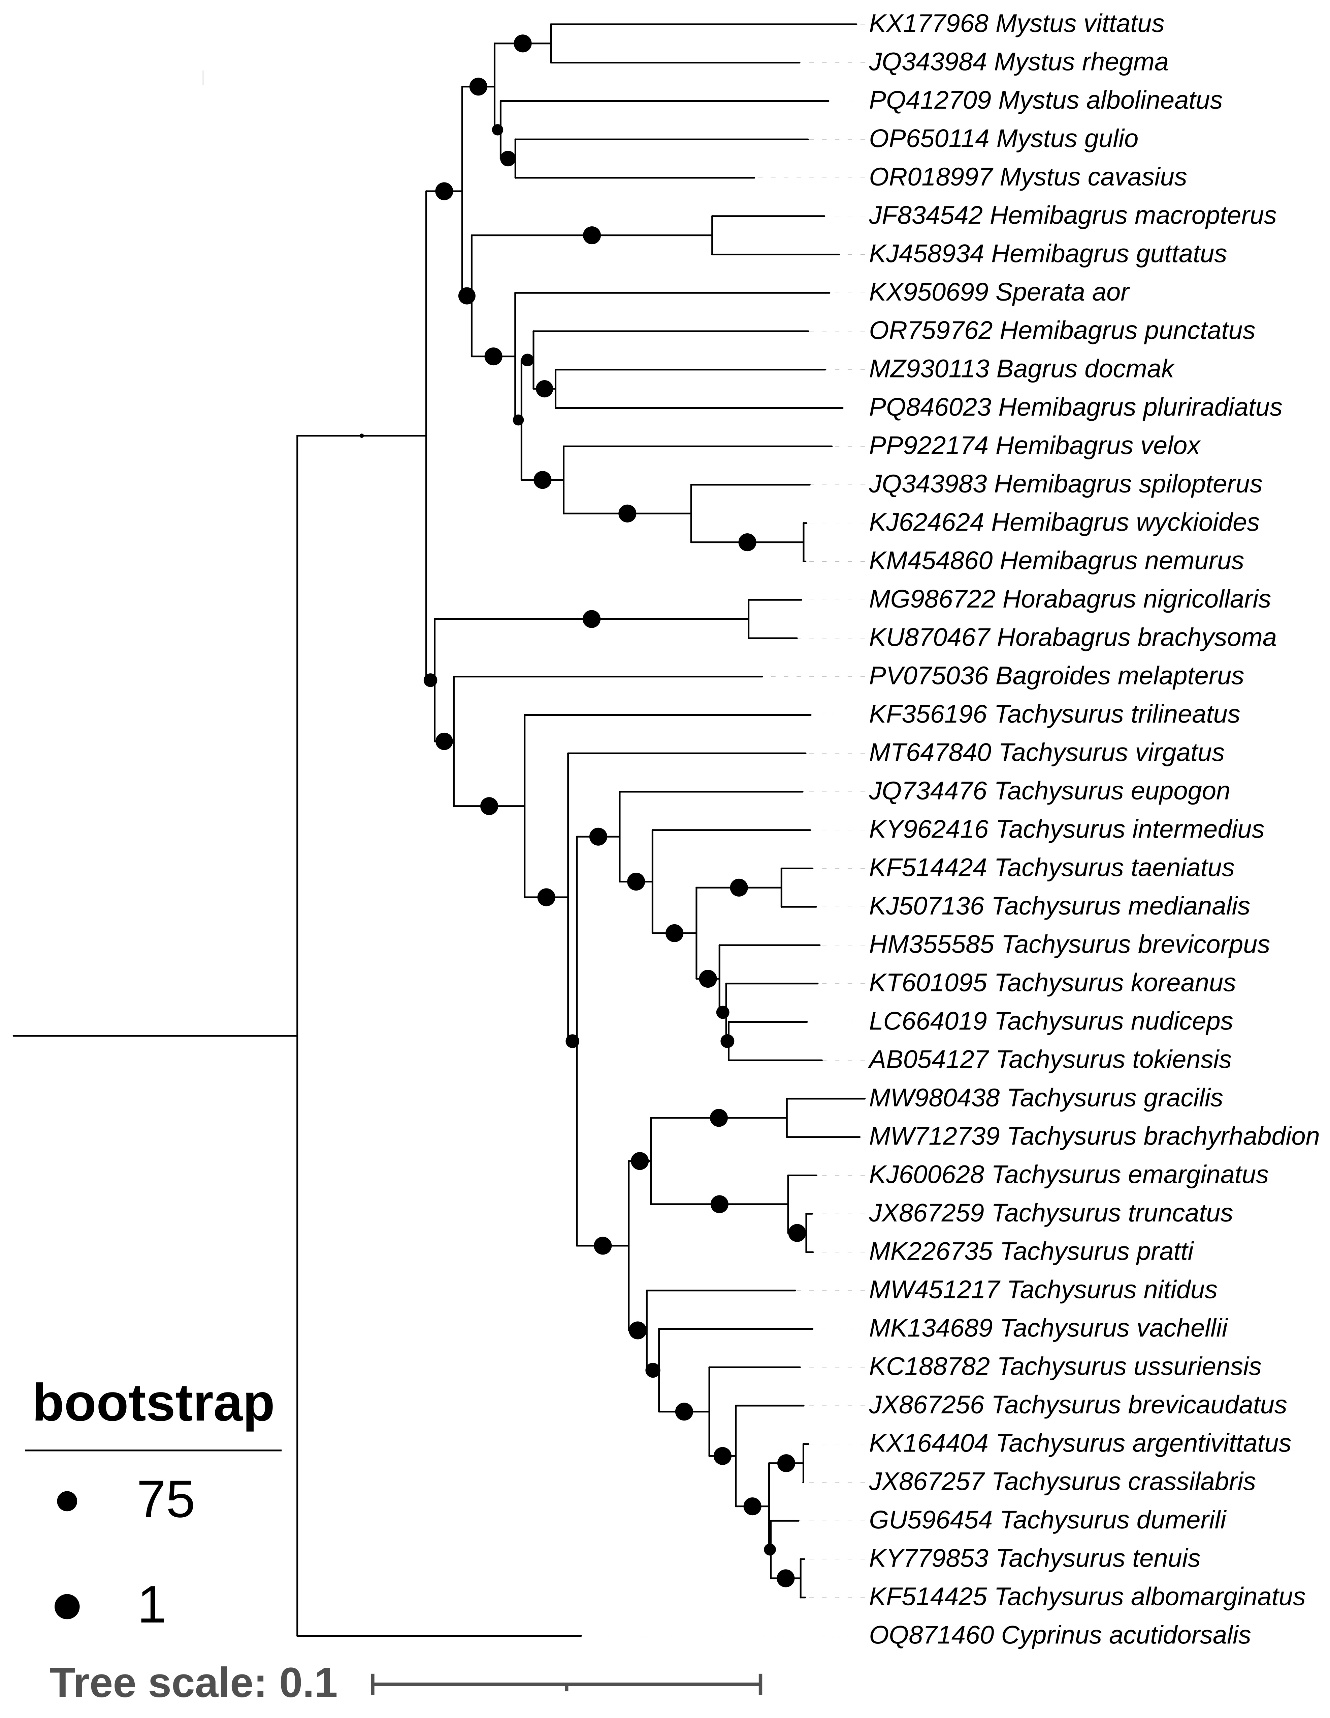


**Supplementary Fig. 3** The Neighbor-Joining (NJ) phylogenetic tree based on 13 PCGs clearly distinguishes the newly sequenced *H. velox* as a distinct lineage within the Bagridae family.

**Supplementary Table 1.** Comparative data of the mitogenome of *H. velox* generated in this study and those of other Bagridae congeners retrieved from GenBank.

| **No.** | **Species name** | **Valid name** | **Length (bp)** | **Accession no.** | **Locality** | **References** |
| --- | --- | --- | --- | --- | --- | --- |
| 1 | *Hemibagrus  velox* | *Hemibagrus  velox* | 16,541 | PP922174 | Lake Singkarak,  Indonesia | This study |
| 2 | *Hemibagrus  nemurus* | *Hemibagrus  nemurus* | 16,526 | KM454860 | Kunming,  China | [41] |
| 3 | *Hemibagrus  guttatus* | *Hemibagrus  guttatus* | 16,528 | KJ458934 | Guangxi,  China | [44] |
| 4 | *Hemibagrus  macropterus* | *Hemibagrus  macropterus* | 16,530 | JF834542 | Chongqing,  China | [45] |
| 5 | *Hemibagrus  pluriradiatus* | *Hemibagrus  pluriradiatus* | 16,519 | PQ846023 | China | Unpublished |
| 6 | *Hemibagrus  punctatus* | *Hemibagrus  punctatus* | 16,527 | OR759762 | Hemmige  Karnataka, India | [46] |
| 7 | *Hemibagrus  spilopterus* | *Hemibagrus  spilopterus* | 16,521 | JQ343983 | Siem Reap,  Cambodia | [47] |
| 8 | *Hemibagrus  wyckioides* | *Hemibagrus  wyckioides* | 16,525 | KJ624624 | Guangzhou,  China | [48] |
| 9 | *Bagroides  melapterus* | *Bagroides  melapterus* | 16,542 | PV075036 | Barito River,  Borneo, Indonesia | Unpublished |
| 10 | *Bagrus  docmak* | *Bagrus  docmak* | 12,946 | MZ930113 | Nile River,  Sudan | Schedel et al. 2022 |
| 11 | *Horabagrus  brachysoma* | *Horabagrus  brachysoma* | 16,567 | KU870467 | India | Unpublished |
| 12 | *Horabagrus  nigricollaris* | *Horabagrus  nigricollaris* | 16,561 | MG986722 | Chalakudy River,  Kerala, India | Kumar et al. 2025 |
| 13 | *Leiocassis  crassilabris* | *Tachysurus  crassilabris* | 16,534 | JX867257 | Yangtze River,  China | Liang et al. 2013a |
| 14 | *Leiocassis  longirostris* | *Tachysurus  dumerili* | 16,534 | GU596454 | Yangtze River,  China | Wang et al. 2011 |
| 15 | *Mystus  albolineatus* | *Mystus  albolineatus* | 16,574 | PQ412709 | Can Tho,  Vietnam | Huynh et al. 2025 |
| 16 | *Mystus  cavasius* | *Mystus  cavasius* | 16,554 | OR018997 | Ganga River,  India | Roy et al. 2024 |
| 17 | *Mystus gulio* | *Mystus  gulio* | 16,518 | OP650114 | Mekong Delta,  Can Tho, Vietnam | Nguyen et al. 2023 |
| 18 | *Mystus  rhegma* | *Mystus  rhegma* | 16,525 | JQ343984 | Siem Reap,  Cambodia | Duan et al. 2019 |
| 19 | *Mystus  vittatus* | *Mystus vittatus* | 16,244 | KX177968 | India | Unpublished |
| 20 | *Pelteobagrus  eupogon* | *Tachysurus  eupogon* | 16,562 | JQ734476 | Yangtze River,  China | Wang et al. 2012 |
| 21 | *Pelteobagrus  intermedius* | *Tachysurus  intermedius* | 16,532 | KY962416 | Guangxi,  China | Fan et al. 2018 |
| 22 | *Pelteobagrus  vachelli* | *Tachysurus  vachellii* | 16,532 | MK134689 | Huai River,  China | Pan et al. 2019 |
| 23 | *Pseudobagrus  albomarginatus* | *Tachysurus  albomarginatus* | 16,533 | KF514425 | Zhejiang,  China | Wei et al. 2013 |
| 24 | *Pseudobagrus  brachyrhabdion* | *Tachysurus  brachyrhabdion* | 16,532 | MW712739 | Guizhou, China | [12] |
| 25 | *Pseudobagrus  brevicaudatus* | *Tachysurus  brevicaudatus* | 16,533 | JX867256 | Yangtze River,  China | Liang et al. 2013b |
| 26 | *Pseudobagrus  brevicorpus* | *Tachysurus  brevicorpus* | 16,526 | HM355585 | Kumho River,  South Korea | Kim et al. 2011 |
| 27 | *Pseudobagrus  emarginatus* | *Tachysurus  emarginatus* | 16,534 | KJ600628 | Yangtze River,  China | Shao et al. 2014 |
| 28 | *Pseudobagrus  gracilis* | *Tachysurus  gracilis* | 16,527 | MW980438 | Guangxi,  China | Zhu and Li 2021 |
| 29 | *Pseudobagrus  koreanus* | *Tachysurus  koreanus* | 16,532 | KT601095 | South Korea | Unpublished |
| 30 | *Pseudobagrus  medianalis* | *Tachysurus  medianalis* | 16,647 | KJ507136 | Yangtze River,  China | Liang et al. 2014 |
| 31 | *Pseudobagrus  ondon* | *Tachysurus  taeniatus* | 16,534 | KF514424 | China | Wang et al. 2013 |
| 32 | *Pseudobagrus  pratti* | *Tachysurus  pratti* | 16,533 | MK226735 | Sichuan,  China | Zou et al. 2019 |
| 33 | *Pseudobagrus  tenuis* | *Tachysurus  tenuis* | 16,535 | KY779853 | Jiangxi,  China | Unpublished |
| 34 | *Pseudobagrus  tokiensis* | *Tachysurus  tokiensis* | 16,529 | AB054127 | Japan | Saitoh et al. 2003 |
| 35 | *Pseudobagrus  trilineatus* | *Tachysurus  trilineatus* | 16,535 | KF356196 | China | Pan et al. 2014 |
| 36 | *Pseudobagrus  truncatus* | *Tachysurus  truncatus* | 16,533 | JX867259 | Yangtze River,  China | Liang et al. 2013c |
| 37 | *Pseudobagrus  ussuriensis* | [*Tachysurus  ussuriensis*](https://www.ncbi.nlm.nih.gov/Taxonomy/Browser/wwwtax.cgi?mode=Tree&id=1828414&lvl=3&lin=f&keep=1&srchmode=1&unlock) | 16,536 | KC188782 | China | Wan et al. 2013 |
| 38 | *Sperata  aor* | *Sperata  aor* | 16,555 | KX950699 | India | Unpublished |
| 39 | *Tachysurus  argentivittatus* | *Tachysurus  argentivittatus* | 16,534 | KX164404 | Heilongjiang,  China | Huang et al. 2016 |
| 40 | *Tachysurus  nitidus* | *Tachysurus  nitidus* | 16,537 | MW451217 | Geum River,  Korea | Kwak et al. 2021 |
| 41 | *Tachysurus  nudiceps* | *Tachysurus  nudiceps* | 16,529 | LC664019 | Kamo River,  Kyoto, Japan | Hashimoto et al. 2022 |
| 42 | *Tachysurus  virgatus* | *Tachysurus  virgatus* | 16,524 | MT647840 | Guangdong,  China | He and Li 2020 |
| 43 | *Cyprinus  acutidorsalis* | *Cyprinus  acutidorsalis* | 16,581 | OQ871460 | Hainan Wanquan  River, China | [58] |

**Relevant References**

Duan S, Pan H, Peng Z. The complete mitochondrial genome of *Mystus rhegma* (Teleostei: Siluriformes) and its phylogenetic position. Mitochondrial DNA B Resour. 2019;4:1788–9. <https://doi.org/10.1080/23802359.2019.1612291>.

Fan JJ, Bai JJ, Ma DM. Characterization of the complete mitochondrial genome of *Pelteobagrus intermedius* (Nichols et Pope). Mitochondrial DNA B Resour. 2018;3:267–9. <https://doi.org/10.1080/23802359.2018.1443031>.

Hashimoto S, Kakehashi R, Mori T, Kambayashi C, Kanao S, Kurabayashi A. The complete mitochondrial genome of a bagrid catfish, *Tachysurus nudiceps*, and its phylogenetic implications for the classification of the bagrid genera. Mitochondrial DNA B Resour. 2022;7:606–8. <https://doi.org/10.1080/23802359.2022.2057253>.

He Y, Li J. The complete mitochondrial genome of *Tachysurus virgatus* (Oshima 1926) (Siluriformes: Bagridae) and its phylogenetic status. Mitochondrial DNA B Resour. 2020;5:3019–20. <https://doi.org/10.1080/23802359.2020.1797555>.

Huang T, Sun H, Han Y. The complete mitochondrial genome of *Leiocassis argentivittatus* (Siluriformes: Bagridae). Mitochondrial DNA B Resour. 2016;1:495–6. <https://doi.org/10.1080/23802359.2016.1192503>.

Huynh TT, Pham TP, Quang MT. Complete mitochondrial genome of the endemic catfish *Mystus albolineatus* Roberts, 1994 (Bagridae) and its phylogenetic relationship. Biomed Biotechnol Res J. 2025;9:48–53. <https://doi.org/10.4103/bbrj.bbrj_36_25>.

Kim SK, Choi EH, Hong KB, Jang KH, Ryu SH, Hwang UW. Complete mitochondrial genome of the Korean stumpy bullhead *Pseudobagrus brevicorpus* (Siluriformes, Bagridae). Mitochondrial DNA A DNA Mapp Seq Anal. 2011;22:44–6. <https://doi.org/10.3109/19401736.2011.597388>.

Kumar VJ, Chandhini S, Arjunan VM, Anvar Ali PH. Whole mitogenome analysis of endangered freshwater catfish *Horabagrus nigricollaris*. Ecol Genet Genomics. 2025;34:100335. <https://doi.org/10.1016/j.egg.2025.100335>.

Kwak YH, Kim KY, Song HY, Song MY. The complete mitochondrial genome of *Tachysurus nitidus* (Siluriformes: Bagridae) from the Geum river in Korea. Mitochondrial DNA B Resour. 2021;6:1330–1. <https://doi.org/10.1080/23802359.2021.1906181>.

Liang HW, Li Z, Zou GW, Shi MY. Complete mitochondrial DNA genome of *Pseudobagrus medianalis* (Siluriformes: Bagridae). Mitochondrial DNA A DNA Mapp Seq Anal. 2014;27:587–8. <https://doi.org/10.3109/19401736.2014.908357>.

Liang HW, Li Z, Zou GW. Complete mitochondrial DNA genome of *Leiocassis crassilabris* (Siluriformes: Bagridae). Mitochondrial DNA A DNA Mapp Seq Anal. 2013a;24:222–4. <https://doi.org/10.3109/19401736.2012.752471>.

Liang HW, Meng Y, Li Z, Zhang Y, Zou GW. Complete mitochondrial DNA genome of *Pseudobagrus brevicaudatus* (Siluriformes: Bagridae). Mitochondrial DNA A DNA Mapp Seq Anal. 2013b;25:169–70. <https://doi.org/10.3109/19401736.2013.792060>.

Liang HW, Meng Y, Li Z, Zhang Y, Zou GW. Complete mitochondrial DNA genome of *Pseudobagrus truncatus* (Siluriformes: Bagridae). Mitochondrial DNA A DNA Mapp Seq Anal. 2013c;25:179–80. <https://doi.org/10.3109/19401736.2013.792065>.

Nguyen HD, Vu MT, Do HDK. The complete mitochondrial genome of *Mystus gulio* Hamilton (Siluriformes: Bagridae) and its phylogenetic implication. Mitochondrial DNA B Resour. 2023;8:439–42. <https://doi.org/10.1080/23802359.2023.2192311>.

Pan D, Wei M, Wan Q, Tao G, Ma Z, Wang H. The complete mitochondrial genome of *Pseudobagrus trilineatus* (Siluriformes: Bagridae). Mitochondrial DNA A DNA Mapp Seq Anal. 2014;26:893–4. <https://doi.org/10.3109/19401736.2013.861447>.

Pan T, Ling J, Jiang H, Duan G, Hu Y, Zhou H, Cui K. The complete mitochondrial genome of *Pelteobagrus vachelli*. Mitochondrial DNA B Resour. 2019;4:828–9. <https://doi.org/10.1080/23802359.2019.1567285>.

Roy S, Parida PK, Ramya VL, Kumar V, Bhakta D, Behera BK, Das BK. Whole mitochondrial genome sequencing and phylogenetic analysis of Gangetic mystus (*Mystus cavasius*). Mitochondrial DNA B Resour. 2024;9:1539–43. <https://doi.org/10.1080/23802359.2024.2427106>.

Saitoh K, Miya M, Inoue JG, Ishiguro NB, Nishida M. Mitochondrial genomics of ostariophysan fishes: Perspectives on phylogeny and biogeography. J Mol Evol. 2003;56:464–72. <https://doi.org/10.1007/s00239-002-2417-y>.

Schedel FDB, Chakona A, Sidlauskas BL, Popoola MO, Usimesa Wingi N, Neumann D, Vreven EJWMN, Schliewen UK. New phylogenetic insights into the African catfish families Mochokidae and Austroglanididae. J Fish Biol. 2022; 100:1171–86. <https://doi.org/10.1111/jfb.15014>.

Shao K, Yan SX, Zhu B, Xiong MH, Tian H, Liao XL. The complete mitochondrial genome of *Pseudobagrus emarginatus* (Siluriformes: Bagridae). Mitochondrial DNA A DNA Mapp Seq Anal. 2014;27:639–40. <https://doi.org/10.3109/19401736.2014.908468>.

Wan Q, Tao G, Cheng Q, Chen Y, Qiao H. The complete mitochondrial genome sequence of *Pseudobagrus ussuriensis* (Siluriformes: Bagridae). Mitochondrial DNA A DNA Mapp Seq Anal. 2013;24:333–5. <https://doi.org/10.3109/19401736.2012.760079>.

Wang H, Li C, Yang X, Yang S, Han J, He L, Wei M, Chen C, Cai L. The complete mitochondrial genome of *Pseudobagrus ondon* Shaw. Mitochondrial DNA A DNA Mapp Seq Anal. 2013;26:631–2. <https://doi.org/10.3109/19401736.2013.834437>.

Wang J, Shen T, Ju J, Yang G. The complete mitochondrial genome of the Chinese longsnout catfish *Leiocassis longirostris* (Siluriformes: Bagridae) and a time-calibrated phylogeny of ostariophysan fishes. Mol Biol Rep. 2011;38:2507–16. <https://doi.org/10.1007/s11033-010-0388-4>.

Wang XY, Cao L, Liang HW, Li Z, Zou GW. Mitochondrial genome of the Shorthead catfish (*Pelteobagrus eupogon*). Mitochondrial DNA A DNA Mapp Seq Anal. 2012;24:1–2. <https://doi.org/10.3109/19401736.2012.710222>.

Wei M, He L, Yang X, Yang S, Wang H, Li C, Chen P. The complete mitochondrial genome of *Pseudobagrus albomarginatus* Rendhal: Sequencing and analysis. Mitochondrial DNA A DNA Mapp Seq Anal. 2013;26:633–5. <https://doi.org/10.3109/19401736.2013.836511>.

Zhu S, Li J. Determination of the complete mitochondrial genome of *Pseudobagrus gracilis* (Siluriformes: Bagridae) and its phylogeny. Mitochondrial DNA B Resour. 2021;6:2371–2. <https://doi.org/10.1080/23802359.2021.1951626>.

Zou Y, Xie M, Tang C, Li X, Fu P, Zhang J, Duan X. The complete mitochondrial genome of *Pseudobagrus pratti* and its phylogeny. Mitochondrial DNA B Resour. 2019;4:1611–2. <https://doi.org/10.1080/23802359.2019.1604185>.

**Supplementary Table 2.** Comparative analysis of intergenic spacerand overlapping regions among the mitogenomes of eight distinct *Hemibagrus* species.

| **Genes** | ***H. velox***  **(PP922174)** | ***H. nemurus***  **(KM454860)** | ***H. guttatus***  **(KJ458934)** | ***H. macropterus***  **(JF834542)** |
| --- | --- | --- | --- | --- |
| *tRNA-Phe (F)* | 0 | 0 | 0 | 0 |
| *12S rRNA* | 0 | 0 | 0 | 0 |
| *tRNA-Val (V)* | 0 | 0 | 0 | 0 |
| *16S rRNA* | 0 | 0 | 0 | 0 |
| *tRNA-Leu (L2)* | 0 | 0 | 0 | 0 |
| *ND1* | 1 | 1 | 5 | 2 |
| *tRNA-Ile (I)* | -1 | -1 | -1 | -1 |
| *tRNA-Gln (Q)* | -1 | -1 | -1 | -1 |
| *tRNA-Met (M)* | 0 | 0 | 0 | 0 |
| *ND2* | 0 | 0 | 0 | 0 |
| *tRNA-Trp (W)* | 3 | 3 | 2 | 2 |
| *tRNA-Ala (A)* | 1 | 1 | 1 | 1 |
| *tRNA-Asn (N)* | 31 | 30 | 30 | 32 |
| *tRNA-Cys (C)* | 2 | 2 | 0 | 0 |
| *tRNA-Tyr (Y)* | 1 | 1 | 1 | 1 |
| *COI* | 0 | 0 | 0 | 0 |
| *tRNA-Ser (S2)* | 4 | 4 | 4 | 4 |
| *tRNA-Asp (D)* | 14 | 14 | 14 | 14 |
| *COII* | 0 | 0 | 0 | 0 |
| *tRNA-Lys (K)* | 1 | 1 | 1 | 1 |
| *ATP8* | -10 | -10 | -10 | -10 |
| *ATP6* | 0 | -1 | -1 | -1 |
| *COIII* | 0 | 0 | 0 | 0 |
| *tRNA-Gly (G)* | 0 | 0 | 0 | 0 |
| *ND3* | 0 | 0 | 0 | 0 |
| *tRNA-Arg (R)* | 0 | 0 | 0 | 0 |
| *ND4L* | -7 | -7 | -7 | 0 |
| *ND4* | 0 | 0 | 0 | 0 |
| *tRNA-His (H)* | 0 | 0 | 0 | 0 |
| *tRNA-Ser (S1)* | 5 | 6 | 4 | 3 |
| *tRNA-Leu (L1)* | 0 | 0 | 0 | 0 |
| *ND5* | -4 | -4 | -4 | -4 |
| *ND6* | 0 | 0 | 0 | 0 |
| *tRNA-Glu (E)* | 2 | 2 | 3 | 2 |
| *Cytb* | 0 | 0 | 0 | 0 |
| *tRNA-Thr (T)* | -2 | -2 | -2 | -2 |
| *tRNA-Pro (P)* | 0 | -34 | 0 | 0 |
| Control region | - | - | - | - |

**Supplementary Table 2.** Continued

| **Genes** | ***H. pluriradiatus***  **(PQ846023)** | ***H. punctatus***  **(OR759762)** | ***H. spilopterus***  **(JQ343983)** | ***H. wyckioides***  **(KJ624624)** |
| --- | --- | --- | --- | --- |
| *tRNA-Phe (F)* | 0 | 0 | 0 | 0 |
| *12S rRNA* | 0 | 0 | 0 | -1 |
| *tRNA-Val (V)* | 0 | 0 | 0 | 0 |
| *16S rRNA* | 0 | 0 | 0 | 0 |
| *tRNA-Leu (L2)* | 0 | 0 | 0 | 0 |
| *ND1* | 0 | 0 | 0 | 1 |
| *tRNA-Ile (I)* | -1 | -1 | -1 | -1 |
| *tRNA-Gln (Q)* | -1 | -1 | -1 | -1 |
| *tRNA-Met (M)* | 1 | 0 | 0 | 0 |
| *ND2* | 0 | 0 | 0 | 0 |
| *tRNA-Trp (W)* | 2 | 2 | 3 | 3 |
| *tRNA-Ala (A)* | 1 | 1 | 1 | 1 |
| *tRNA-Asn (N)* | 30 | 30 | 30 | 30 |
| *tRNA-Cys (C)* | 2 | 2 | 2 | 2 |
| *tRNA-Tyr (Y)* | 1 | 1 | 1 | 1 |
| *COI* | 0 | 0 | 0 | 0 |
| *tRNA-Ser (S2)* | 4 | 4 | 4 | 4 |
| *tRNA-Asp (D)* | 14 | 14 | 14 | 14 |
| *COII* | 0 | 0 | 0 | 0 |
| *tRNA-Lys (K)* | 1 | 1 | 1 | 1 |
| *ATP8* | -10 | -10 | -10 | -10 |
| *ATP6* | -1 | 0 | -1 | -1 |
| *COIII* | 0 | 0 | 0 | 0 |
| *tRNA-Gly (G)* | 0 | 0 | 0 | 0 |
| *ND3* | 0 | 0 | 0 | 0 |
| *tRNA-Arg (R)* | 0 | 0 | 0 | 0 |
| *ND4L* | -7 | -7 | 0 | 0 |
| *ND4* | 0 | 0 | 0 | 0 |
| *tRNA-His (H)* | 0 | 0 | 0 | 0 |
| *tRNA-Ser (S1)* | 4 | 4 | 6 | 6 |
| *tRNA-Leu (L1)* | 0 | 0 | 0 | 0 |
| *ND5* | -4 | -4 | -4 | -4 |
| *ND6* | 0 | 0 | 0 | 0 |
| *tRNA-Glu (E)* | 2 | 2 | 2 | 2 |
| *Cytb* | 0 | 0 | 0 | 0 |
| *tRNA-Thr (T)* | -2 | -2 | -1 | 0 |
| *tRNA-Pro (P)* | -1 | 0 | 0 | 0 |
| Control region | - | - | - | - |

**Supplementary Table 3.** Comprehensive comparison of start and stop codons in the eight PCGs of *Hemibagrus* mitogenomes.

| **Genes** | ***H. velox***  **(PP922174)** | | ***H. nemurus* (KM454860)** | | ***H. guttatus* (KJ458934)** | | ***H. macropterus* (JF834542)** | |
| --- | --- | --- | --- | --- | --- | --- | --- | --- |
| Start | Stop | Start | Stop | Start | Stop | Start | Stop |
| *ND1* | ATG | TAA | ATG | TAA | ATG | TAA | ATG | TAA |
| *ND2* | ATG | TA- | ATG | T-- | ATG | T-- | ATG | T-- |
| *COI* | GTG | TAA | GTG | TAA | GTG | TAA | GTG | TAA |
| *COII* | ATG | T-- | ATG | T-- | ATG | T-- | ATG | T-- |
| *ATP8* | ATG | TAA | ATG | TAA | ATG | TAA | ATG | TAA |
| *ATP6* | ATG | TA- | ATG | TAA | ATA | TAA | ATG | TAA |
| *COIII* | ATG | T-- | ATG | T-- | ATG | T-- | ATG | T-- |
| *ND3* | ATG | T-- | ATG | T-- | ATG | T-- | ATG | T-- |
| *ND4L* | ATG | TAA | ATG | TAA | ATG | TAA | ATG | TAA |
| *ND4* | ATG | T-- | ATG | T-- | ATG | T-- | ATG | T-- |
| *ND5* | ATG | TAA | ATG | TAA | ATG | TAA | ATG | TAG |
| *ND6* | ATG | TAA | ATG | TAG | ATG | TAG | ATG | TAG |
| *Cytb* | ATG | T-- | ATG | T-- | ATG | T-- | ATG | T-- |
| **Genes** | ***H. pluriradiatus* (PQ846023)** | | ***H. punctatus* (OR759762)** | | ***H. spilopterus* (JQ343983)** | | ***H. wyckioides* (KJ624624)** | |
| Start | Stop | Start | Stop | Start | Stop | Start | Stop |
| *ND1* | ATG | TA- | ATG | TA- | ATG | TAA | ATG | TAA |
| *ND2* | ATG | T-- | ATG | T-- | ATG | T-- | ATG | T-- |
| *COI* | GTG | TAA | GTG | TAA | GTG | TAA | GTG | TAA |
| *COII* | ATG | T-- | ATG | T-- | ATG | T-- | ATG | T-- |
| *ATP8* | ATG | TAA | ATG | TAA | ATG | TAA | ATG | TAA |
| *ATP6* | ATG | TA- | ATG | TAA | ATG | TAA | ATG | TAA |
| *COIII* | ATG | T-- | ATG | T-- | ATG | T-- | ATG | T-- |
| *ND3* | ATG | T-- | ATG | T-- | ATG | T-- | ATG | T-- |
| *ND4L* | ATG | TAA | ATG | TAA | ATG | TAA | ATG | TAA |
| *ND4* | ATG | T-- | ATG | T-- | ATG | T-- | ATG | T-- |
| *ND5* | ATG | TAA | ATG | TAA | ATG | TAA | ATG | TAA |
| *ND6* | ATG | TAG | ATG | TAG | ATG | TAG | ATG | TAG |
| *Cytb* | ATG | T-- | ATG | T-- | ATG | T-- | ATG | T-- |

**Supplementary Table 4.** Pairwise Ka/Ks ratios of the 13 PCGs among *Hemibagrus* species mitogenomes.

| **Genes** | ***ND1*** | ***ND2*** | ***COI*** | ***COII*** | ***ATP8*** | ***ATP6*** | ***COIII*** |
| --- | --- | --- | --- | --- | --- | --- | --- |
| 1 | 0.046425826 | 0.068467098 | 0.002614178 | 0.02919708 | 0.233357718 | 0.00878875 | 0.028215223 |
| 2 | 0.047274652 | 0.096951974 | 0.007439199 | 0.023774146 | 0.180689655 | 0.013339762 | 0.03724121 |
| 3 | 0.046386846 | 0.118267473 | 0.006725146 | 0.018431141 | 0.287467134 | 0.025200588 | 0.02937564 |
| 4 | 0.062659847 | 0.095305082 | 0.001986213 | 0.023138106 | 0.159340659 | 0.018954851 | 0.037861525 |
| 5 | 0.057618607 | 0.098567236 | 0.007270084 | 0.033109717 | 0.220440337 | 0.039392555 | 0.053393214 |
| 6 | 0.048578199 | 0.067863894 | 0.00423867 | 0.018603133 | 0.233357718 | 0.008856683 | 0.03147301 |
| 7 | 0.045771446 | 0.068467098 | 0.005374693 | 0.02919708 | 0.233357718 | 0.00878875 | 0.028215223 |
| Average | 0.050673632 | 0.087698551 | 0.005092598 | 0.025064343 | 0.22114442 | 0.01761742 | 0.035110721 |
| STDEV | 0.006687024 | 0.019702723 | 0.002217888 | 0.005627443 | 0.041438679 | 0.01143379 | 0.009014575 |
| **Genes** | ***ND3*** | ***ND4L*** | ***ND4*** | ***ND5*** | ***ND6*** | ***Cytb*** |  |
| 1 | 0.06124031 | 0.025252525 | 0.033438833 | 0.026553594 | 0.027804258 | 0.282644628 |  |
| 2 | 0.043526942 | 0.044122716 | 0.058639562 | 0.036881297 | 0.06234414 | 0.240378922 |  |
| 3 | 0.033655476 | 0.0409257 | 0.048237664 | 0.043170163 | 0.063147845 | 0.249313912 |  |
| 4 | 0.045547148 | 0.022814601 | 0.027295285 | 0.039227376 | 0.038946791 | 0.225922023 |  |
| 5 | 0.06647266 | 0.037276786 | 0.032740132 | 0.04911192 | 0.051017563 | 0.333038087 |  |
| 6 | 0.055364941 | 0.019329632 | 0.036779174 | 0.037187194 | 0.027260413 | 0.258370183 |  |
| 7 | 0.06124031 | 0.025252525 | 0.033438833 | 0.027492363 | 0.027804258 | 0.282644628 |  |
| Average | 0.052435398 | 0.030710641 | 0.038652783 | 0.037089129 | 0.042617895 | 0.267473198 |  |
| STDEV | 0.011833385 | 0.009821764 | 0.010902404 | 0.008054469 | 0.016172894 | 0.035665865 |  |

**Supplementary Table 5.** The RSCU abundance and CDsPT of the eight PCGs in the mitogenomes of *Hemibagrus* species.

| **Amino acids** | ***H. velox* (PP922174)** | | ***H. nemurus* (KM454860)** | | ***H. guttatus* (KJ458934)** | |
| --- | --- | --- | --- | --- | --- | --- |
| Abundance | CDsPT | Abundance | CDsPT | Abundance | CDsPT |
| Ala | 140 | 36.900369 | 137 | 36.10964681 | 139 | 37.20556745 |
| Arg | 233 | 61.41275698 | 239 | 62.99420137 | 244 | 65.31049251 |
| Asn | 234 | 61.67633105 | 237 | 62.46705324 | 237 | 63.43683084 |
| Asp | 52 | 13.70585134 | 48 | 12.65155509 | 51 | 13.6509636 |
| Cys | 115 | 30.3110174 | 109 | 28.72957301 | 101 | 27.03426124 |
| Gln | 118 | 31.10173959 | 117 | 30.83816552 | 109 | 29.17558887 |
| Glu | 56 | 14.7601476 | 58 | 15.28729573 | 53 | 14.1862955 |
| Gly | 129 | 34.0010543 | 123 | 32.41960991 | 111 | 29.71092077 |
| His | 182 | 47.9704797 | 171 | 45.071165 | 166 | 44.43254818 |
| Ile | 306 | 80.65366368 | 295 | 77.75434897 | 331 | 88.59743041 |
| Leu | 432 | 113.8639958 | 434 | 114.3911439 | 426 | 114.0256959 |
| Lys | 108 | 28.46599895 | 108 | 28.46599895 | 106 | 28.37259101 |
| Met | 45 | 11.86083289 | 47 | 12.38798102 | 48 | 12.84796574 |
| Phe | 123 | 32.41960991 | 134 | 35.31892462 | 155 | 41.4882227 |
| Pro | 343 | 90.40590406 | 340 | 89.61518187 | 282 | 75.48179872 |
| Ser | 362 | 95.41381128 | 356 | 93.8323669 | 374 | 100.1070664 |
| Thr | 267 | 70.37427517 | 282 | 74.32788614 | 250 | 66.91648822 |
| Trp | 49 | 12.91512915 | 55 | 14.49657354 | 60 | 16.05995717 |
| Tyr | 213 | 56.1412757 | 222 | 58.51344228 | 222 | 59.42184154 |
| Val | 95 | 25.03953611 | 90 | 23.72166579 | 84 | 22.48394004 |
| Stp | 192 | 50.60622035 | 192 | 50.60622035 | 187 | 50.05353319 |
| **Amino** **acids** | ***H. macropterus* (JF834542)** | | ***H. pluriradiatus* (PQ846023)** | | ***H. punctatus* (OR759762)** | |
| Abundance | CDsPT | Abundance | CDsPT | Abundance | CDsPT |
| Ala | 130 | 34.25559947 | 134 | 35.33755274 | 103 | 27.47399306 |
| Arg | 252 | 66.40316206 | 222 | 58.5443038 | 236 | 62.95012003 |
| Asn | 238 | 62.7140975 | 243 | 64.08227848 | 241 | 64.28380902 |
| Asp | 60 | 15.81027668 | 49 | 12.92194093 | 52 | 13.87036543 |
| Cys | 94 | 24.76943347 | 108 | 28.48101266 | 119 | 31.74179781 |
| Gln | 111 | 29.24901186 | 107 | 28.21729958 | 107 | 28.54094425 |
| Glu | 57 | 15.01976285 | 55 | 14.50421941 | 53 | 14.13710323 |
| Gly | 97 | 25.5599473 | 104 | 27.42616034 | 93 | 24.8066151 |
| His | 178 | 46.90382082 | 173 | 45.62236287 | 186 | 49.61323019 |
| Ile | 322 | 84.84848485 | 315 | 83.06962025 | 327 | 87.22325954 |
| Leu | 441 | 116.2055336 | 455 | 119.9894515 | 431 | 114.9639904 |
| Lys | 111 | 29.24901186 | 119 | 31.38185654 | 110 | 29.34115764 |
| Met | 49 | 12.91172596 | 50 | 13.18565401 | 52 | 13.87036543 |
| Phe | 145 | 38.20816864 | 150 | 39.55696203 | 137 | 36.54307815 |
| Pro | 296 | 77.99736495 | 338 | 89.1350211 | 272 | 72.55268071 |
| Ser | 396 | 104.3478261 | 353 | 93.0907173 | 379 | 101.093625 |
| Thr | 258 | 67.98418972 | 262 | 69.092827 | 279 | 74.41984529 |
| Trp | 62 | 16.3372859 | 59 | 15.55907173 | 71 | 18.93838357 |
| Tyr | 224 | 59.02503294 | 225 | 59.33544304 | 226 | 60.28274206 |
| Val | 91 | 23.97891963 | 77 | 20.30590717 | 89 | 23.73966391 |
| Stp | 183 | 48.22134387 | 194 | 51.16033755 | 186 | 49.61323019 |
| **Amino acids** | ***H. spilopterus* (JQ343983)** | | ***H. wyckioides* (KJ624624)** | |  |  |
| Abundance | CDsPT | Abundance | CDsPT |  |  |
| Ala | 132 | 34.79177649 | 138 | 36.37322088 |  |  |
| Arg | 240 | 63.25777543 | 240 | 63.25777543 |  |  |
| Asn | 231 | 60.88560886 | 237 | 62.46705324 |  |  |
| Asp | 47 | 12.38798102 | 48 | 12.65155509 |  |  |
| Cys | 105 | 27.67527675 | 108 | 28.46599895 |  |  |
| Gln | 115 | 30.3110174 | 117 | 30.83816552 |  |  |
| Glu | 57 | 15.02372167 | 58 | 15.28729573 |  |  |
| Gly | 119 | 31.36531365 | 123 | 32.41960991 |  |  |
| His | 184 | 48.49762783 | 169 | 44.54401687 |  |  |
| Ile | 301 | 79.33579336 | 295 | 77.75434897 |  |  |
| Leu | 433 | 114.1275698 | 435 | 114.654718 |  |  |
| Lys | 110 | 28.99314707 | 108 | 28.46599895 |  |  |
| Met | 44 | 11.59725883 | 47 | 12.38798102 |  |  |
| Phe | 136 | 35.84607275 | 134 | 35.31892462 |  |  |
| Pro | 350 | 92.25092251 | 338 | 89.08803374 |  |  |
| Ser | 347 | 91.46020032 | 358 | 94.35951502 |  |  |
| Thr | 286 | 75.38218239 | 281 | 74.06431207 |  |  |
| Trp | 54 | 14.23299947 | 56 | 14.7601476 |  |  |
| Tyr | 217 | 57.19557196 | 223 | 58.77701634 |  |  |
| Val | 90 | 23.72166579 | 90 | 23.72166579 |  |  |
| Stp | 196 | 51.66051661 | 191 | 50.34264628 |  |  |

**Supplementary Table 6.** The RSCU values of the eight PCGs in the mitogenomes of *Hemibagrus* species.

| ***Hemibagrus velox* (PP922174)** | | | | | | | | | | | |
| --- | --- | --- | --- | --- | --- | --- | --- | --- | --- | --- | --- |
| Codon | Count | RSCU | Codon | Count | RSCU | Codon | Count | RSCU | Codon | Count | RSCU |
| UUU(F) | 73 | 1.19 | UCU(S) | 64 | 1.06 | UAU(Y) | 118 | 1.11 | UGU(C) | 57 | 0.99 |
| UUC(F) | 50 | 0.81 | UCC(S) | 58 | 0.96 | UAC(Y) | 95 | 0.89 | UGC(C) | 58 | 1.01 |
| UUA(L) | 69 | 0.96 | UCA(S) | 70 | 1.16 | UAA(*) | 89 | 1.39 | UGA(*) | 52 | 0.81 |
| UUG(L) | 32 | 0.44 | UCG(S) | 21 | 0.35 | UAG(*) | 51 | 0.80 | UGG(W) | 49 | 1.00 |
| CUU(L) | 113 | 1.57 | CCU(P) | 114 | 1.33 | CAU(H) | 87 | 0.96 | CGU(R) | 26 | 0.67 |
| CUC(L) | 64 | 0.89 | CCC(P) | 91 | 1.06 | CAC(H) | 95 | 1.04 | CGC(R) | 34 | 0.88 |
| CUA(L) | 110 | 1.53 | CCA(P) | 104 | 1.21 | CAA(Q) | 91 | 1.54 | CGA(R) | 34 | 0.88 |
| CUG(L) | 44 | 0.61 | CCG(P) | 34 | 0.40 | CAG(Q) | 27 | 0.46 | CGG(R) | 32 | 0.82 |
| AUU(I) | 156 | 1.53 | ACU(T) | 103 | 1.54 | AAU(N) | 141 | 1.21 | AGU(S) | 59 | 0.98 |
| AUC(I) | 65 | 0.64 | ACC(T) | 73 | 1.09 | AAC(N) | 93 | 0.79 | AGC(S) | 90 | 1.49 |
| AUA(I) | 85 | 0.83 | ACA(T) | 77 | 1.15 | AAA(K) | 91 | 1.69 | AGA(R) | 45 | 1.16 |
| AUG(M) | 45 | 1.00 | ACG(T) | 14 | 0.21 | AAG(K) | 17 | 0.31 | AGG(R) | 62 | 1.60 |
| GUU(V) | 33 | 1.39 | GCU(A) | 31 | 0.89 | GAU(D) | 21 | 0.81 | GGU(G) | 28 | 0.87 |
| GUC(V) | 19 | 0.80 | GCC(A) | 63 | 1.80 | GAC(D) | 31 | 1.19 | GGC(G) | 43 | 1.33 |
| GUA(V) | 26 | 1.09 | GCA(A) | 37 | 1.06 | GAA(E) | 42 | 1.50 | GGA(G) | 29 | 0.90 |
| GUG(V) | 17 | 0.72 | GCG(A) | 9 | 0.26 | GAG(E) | 14 | 0.50 | GGG(G) | 29 | 0.90 |
| ***Hemibagrus nemurus* (KM454860)** | | | | | | | | | | | |
| Codon | Count | RSCU | Codon | Count | RSCU | Codon | Count | RSCU | Codon | Count | RSCU |
| UUU(F) | 94 | 1.40 | UCU(S) | 57 | 0.96 | UAU(Y) | 125 | 1.13 | UGU(C) | 55 | 1.01 |
| UUC(F) | 40 | 0.60 | UCC(S) | 60 | 1.01 | UAC(Y) | 97 | 0.87 | UGC(C) | 54 | 0.99 |
| UUA(L) | 79 | 1.09 | UCA(S) | 69 | 1.16 | UAA(*) | 82 | 1.28 | UGA(*) | 61 | 0.95 |
| UUG(L) | 32 | 0.44 | UCG(S) | 20 | 0.34 | UAG(*) | 49 | 0.77 | UGG(W) | 55 | 1.00 |
| CUU(L) | 99 | 1.37 | CCU(P) | 111 | 1.31 | CAU(H) | 73 | 0.85 | CGU(R) | 31 | 0.78 |
| CUC(L) | 77 | 1.06 | CCC(P) | 89 | 1.05 | CAC(H) | 98 | 1.15 | CGC(R) | 41 | 1.03 |
| CUA(L) | 103 | 1.42 | CCA(P) | 108 | 1.27 | CAA(Q) | 90 | 1.54 | CGA(R) | 38 | 0.95 |
| CUG(L) | 44 | 0.61 | CCG(P) | 32 | 0.38 | CAG(Q) | 27 | 0.46 | CGG(R) | 28 | 0.70 |
| AUU(I) | 152 | 1.55 | ACU(T) | 105 | 1.49 | AAU(N) | 142 | 1.20 | AGU(S) | 59 | 0.99 |
| AUC(I) | 63 | 0.64 | ACC(T) | 77 | 1.09 | AAC(N) | 95 | 0.80 | AGC(S) | 91 | 1.53 |
| AUA(I) | 80 | 0.81 | ACA(T) | 78 | 1.11 | AAA(K) | 89 | 1.65 | AGA(R) | 43 | 1.08 |
| AUG(M) | 47 | 1.00 | ACG(T) | 22 | 0.31 | AAG(K) | 19 | 0.35 | AGG(R) | 58 | 1.46 |
| GUU(V) | 29 | 1.29 | GCU(A) | 35 | 1.02 | GAU(D) | 16 | 0.67 | GGU(G) | 27 | 0.88 |
| GUC(V) | 21 | 0.93 | GCC(A) | 56 | 1.64 | GAC(D) | 32 | 1.33 | GGC(G) | 40 | 1.30 |
| GUA(V) | 27 | 1.20 | GCA(A) | 36 | 1.05 | GAA(E) | 45 | 1.55 | GGA(G) | 35 | 1.14 |
| GUG(V) | 13 | 0.58 | GCG(A) | 10 | 0.29 | GAG(E) | 13 | 0.45 | GGG(G) | 21 | 0.68 |
| ***Hemibagrus guttatus* (KJ458934)** | | | | | | | | | | | |
| Codon | Count | RSCU | Codon | Count | RSCU | Codon | Count | RSCU | Codon | Count | RSCU |
| UUU(F) | 98 | 1.26 | UCU(S) | 70 | 1.12 | UAU(Y) | 131 | 1.18 | UGU(C) | 51 | 1.01 |
| UUC(F) | 57 | 0.74 | UCC(S) | 64 | 1.03 | UAC(Y) | 91 | 0.82 | UGC(C) | 50 | 0.99 |
| UUA(L) | 105 | 1.48 | UCA(S) | 72 | 1.16 | UAA(*) | 79 | 1.27 | UGA(*) | 58 | 0.93 |
| UUG(L) | 36 | 0.51 | UCG(S) | 21 | 0.34 | UAG(*) | 50 | 0.80 | UGG(W) | 60 | 1.00 |
| CUU(L) | 86 | 1.21 | CCU(P) | 107 | 1.52 | CAU(H) | 90 | 1.08 | CGU(R) | 31 | 0.76 |
| CUC(L) | 64 | 0.90 | CCC(P) | 77 | 1.09 | CAC(H) | 76 | 0.92 | CGC(R) | 51 | 1.25 |
| CUA(L) | 95 | 1.34 | CCA(P) | 75 | 1.06 | CAA(Q) | 80 | 1.47 | CGA(R) | 30 | 0.74 |
| CUG(L) | 40 | 0.56 | CCG(P) | 23 | 0.33 | CAG(Q) | 29 | 0.53 | CGG(R) | 21 | 0.52 |
| AUU(I) | 168 | 1.52 | ACU(T) | 90 | 1.44 | AAU(N) | 152 | 1.28 | AGU(S) | 57 | 0.91 |
| AUC(I) | 67 | 0.61 | ACC(T) | 70 | 1.12 | AAC(N) | 85 | 0.72 | AGC(S) | 90 | 1.44 |
| AUA(I) | 96 | 0.87 | ACA(T) | 75 | 1.20 | AAA(K) | 86 | 1.62 | AGA(R) | 48 | 1.18 |
| AUG(M) | 48 | 1.00 | ACG(T) | 15 | 0.24 | AAG(K) | 20 | 0.38 | AGG(R) | 63 | 1.55 |
| GUU(V) | 29 | 1.38 | GCU(A) | 28 | 0.81 | GAU(D) | 27 | 1.06 | GGU(G) | 33 | 1.19 |
| GUC(V) | 11 | 0.52 | GCC(A) | 62 | 1.78 | GAC(D) | 24 | 0.94 | GGC(G) | 22 | 0.79 |
| GUA(V) | 35 | 1.67 | GCA(A) | 40 | 1.15 | GAA(E) | 39 | 1.47 | GGA(G) | 34 | 1.23 |
| GUG(V) | 9 | 0.43 | GCG(A) | 9 | 0.26 | GAG(E) | 14 | 0.53 | GGG(G) | 22 | 0.79 |
| ***Hemibagrus macropterus* (JF834542)** | | | | | | | | | | | |
| Codon | Count | RSCU | Codon | Count | RSCU | Codon | Count | RSCU | Codon | Count | RSCU |
| UUU(F) | 97 | 1.34 | UCU(S) | 68 | 1.03 | UAU(Y) | 128 | 1.14 | UGU(C) | 46 | 0.98 |
| UUC(F) | 48 | 0.66 | UCC(S) | 75 | 1.14 | UAC(Y) | 96 | 0.86 | UGC(C) | 48 | 1.02 |
| UUA(L) | 95 | 1.29 | UCA(S) | 79 | 1.20 | UAA(*) | 77 | 1.26 | UGA(*) | 55 | 0.90 |
| UUG(L) | 41 | 0.56 | UCG(S) | 20 | 0.30 | UAG(*) | 51 | 0.84 | UGG(W) | 62 | 1.00 |
| CUU(L) | 105 | 1.43 | CCU(P) | 120 | 1.62 | CAU(H) | 97 | 1.09 | CGU(R) | 35 | 0.83 |
| CUC(L) | 66 | 0.90 | CCC(P) | 73 | 0.99 | CAC(H) | 81 | 0.91 | CGC(R) | 49 | 1.17 |
| CUA(L) | 97 | 1.32 | CCA(P) | 80 | 1.08 | CAA(Q) | 86 | 1.55 | CGA(R) | 31 | 0.74 |
| CUG(L) | 37 | 0.50 | CCG(P) | 23 | 0.31 | CAG(Q) | 25 | 0.45 | CGG(R) | 23 | 0.55 |
| AUU(I) | 162 | 1.51 | ACU(T) | 96 | 1.49 | AAU(N) | 147 | 1.24 | AGU(S) | 62 | 0.94 |
| AUC(I) | 69 | 0.64 | ACC(T) | 70 | 1.09 | AAC(N) | 91 | 0.76 | AGC(S) | 92 | 1.39 |
| AUA(I) | 91 | 0.85 | ACA(T) | 78 | 1.21 | AAA(K) | 87 | 1.57 | AGA(R) | 49 | 1.17 |
| AUG(M) | 49 | 1.00 | ACG(T) | 14 | 0.22 | AAG(K) | 24 | 0.43 | AGG(R) | 65 | 1.55 |
| GUU(V) | 26 | 1.14 | GCU(A) | 22 | 0.68 | GAU(D) | 31 | 1.03 | GGU(G) | 29 | 1.20 |
| GUC(V) | 16 | 0.70 | GCC(A) | 60 | 1.85 | GAC(D) | 29 | 0.97 | GGC(G) | 19 | 0.78 |
| GUA(V) | 36 | 1.58 | GCA(A) | 40 | 1.23 | GAA(E) | 38 | 1.33 | GGA(G) | 33 | 1.36 |
| GUG(V) | 13 | 0.57 | GCG(A) | 8 | 0.25 | GAG(E) | 19 | 0.67 | GGG(G) | 16 | 0.66 |
| ***Hemibagrus pluriradiatus* (PQ846023)** | | | | | | | | | | | |
| Codon | Count | RSCU | Codon | Count | RSCU | Codon | Count | RSCU | Codon | Count | RSCU |
| UUU(F) | 95 | 1.27 | UCU(S) | 59 | 1.00 | UAU(Y) | 137 | 1.22 | UGU(C) | 43 | 0.80 |
| UUC(F) | 55 | 0.73 | UCC(S) | 53 | 0.90 | UAC(Y) | 88 | 0.78 | UGC(C) | 65 | 1.20 |
| UUA(L) | 92 | 1.21 | UCA(S) | 69 | 1.17 | UAA(*) | 87 | 1.35 | UGA(*) | 58 | 0.90 |
| UUG(L) | 29 | 0.38 | UCG(S) | 21 | 0.36 | UAG(*) | 49 | 0.76 | UGG(W) | 59 | 1.00 |
| CUU(L) | 120 | 1.58 | CCU(P) | 117 | 1.38 | CAU(H) | 92 | 1.06 | CGU(R) | 35 | 0.95 |
| CUC(L) | 62 | 0.82 | CCC(P) | 94 | 1.11 | CAC(H) | 81 | 0.94 | CGC(R) | 29 | 0.78 |
| CUA(L) | 112 | 1.48 | CCA(P) | 101 | 1.20 | CAA(Q) | 80 | 1.50 | CGA(R) | 34 | 0.92 |
| CUG(L) | 40 | 0.53 | CCG(P) | 26 | 0.31 | CAG(Q) | 27 | 0.50 | CGG(R) | 21 | 0.57 |
| AUU(I) | 174 | 1.66 | ACU(T) | 98 | 1.50 | AAU(N) | 145 | 1.19 | AGU(S) | 58 | 0.99 |
| AUC(I) | 56 | 0.53 | ACC(T) | 72 | 1.10 | AAC(N) | 98 | 0.81 | AGC(S) | 93 | 1.58 |
| AUA(I) | 85 | 0.81 | ACA(T) | 76 | 1.16 | AAA(K) | 94 | 1.58 | AGA(R) | 47 | 1.27 |
| AUG(M) | 50 | 1.00 | ACG(T) | 16 | 0.24 | AAG(K) | 25 | 0.42 | AGG(R) | 56 | 1.51 |
| GUU(V) | 24 | 1.25 | GCU(A) | 29 | 0.87 | GAU(D) | 21 | 0.86 | GGU(G) | 21 | 0.81 |
| GUC(V) | 14 | 0.73 | GCC(A) | 60 | 1.79 | GAC(D) | 28 | 1.14 | GGC(G) | 31 | 1.19 |
| GUA(V) | 25 | 1.30 | GCA(A) | 39 | 1.16 | GAA(E) | 43 | 1.56 | GGA(G) | 30 | 1.15 |
| GUG(V) | 14 | 0.73 | GCG(A) | 6 | 0.18 | GAG(E) | 12 | 0.44 | GGG(G) | 22 | 0.85 |
| ***Hemibagrus punctatus* (OR759762)** | | | | | | | | | | | |
| Codon | Count | RSCU | Codon | Count | RSCU | Codon | Count | RSCU | Codon | Count | RSCU |
| UUU(F) | 80 | 1.17 | UCU(S) | 63 | 1.00 | UAU(Y) | 130 | 1.15 | UGU(C) | 52 | 0.87 |
| UUC(F) | 57 | 0.83 | UCC(S) | 61 | 0.97 | UAC(Y) | 96 | 0.85 | UGC(C) | 67 | 1.13 |
| UUA(L) | 96 | 1.34 | UCA(S) | 80 | 1.27 | UAA(*) | 86 | 1.39 | UGA(*) | 52 | 0.84 |
| UUG(L) | 30 | 0.42 | UCG(S) | 21 | 0.33 | UAG(*) | 48 | 0.77 | UGG(W) | 71 | 1.00 |
| CUU(L) | 119 | 1.66 | CCU(P) | 101 | 1.49 | CAU(H) | 97 | 1.04 | CGU(R) | 30 | 0.76 |
| CUC(L) | 61 | 0.85 | CCC(P) | 62 | 0.91 | CAC(H) | 89 | 0.96 | CGC(R) | 28 | 0.71 |
| CUA(L) | 90 | 1.25 | CCA(P) | 86 | 1.26 | CAA(Q) | 82 | 1.53 | CGA(R) | 34 | 0.86 |
| CUG(L) | 35 | 0.49 | CCG(P) | 23 | 0.34 | CAG(Q) | 25 | 0.47 | CGG(R) | 18 | 0.46 |
| AUU(I) | 167 | 1.53 | ACU(T) | 108 | 1.55 | AAU(N) | 154 | 1.28 | AGU(S) | 62 | 0.98 |
| AUC(I) | 64 | 0.59 | ACC(T) | 77 | 1.10 | AAC(N) | 87 | 0.72 | AGC(S) | 92 | 1.46 |
| AUA(I) | 96 | 0.88 | ACA(T) | 81 | 1.16 | AAA(K) | 90 | 1.64 | AGA(R) | 53 | 1.35 |
| AUG(M) | 52 | 1.00 | ACG(T) | 13 | 0.19 | AAG(K) | 20 | 0.36 | AGG(R) | 73 | 1.86 |
| GUU(V) | 32 | 1.44 | GCU(A) | 21 | 0.82 | GAU(D) | 25 | 0.96 | GGU(G) | 23 | 0.99 |
| GUC(V) | 14 | 0.63 | GCC(A) | 42 | 1.63 | GAC(D) | 27 | 1.04 | GGC(G) | 25 | 1.08 |
| GUA(V) | 29 | 1.30 | GCA(A) | 35 | 1.36 | GAA(E) | 42 | 1.58 | GGA(G) | 24 | 1.03 |
| GUG(V) | 14 | 0.63 | GCG(A) | 5 | 0.19 | GAG(E) | 11 | 0.42 | GGG(G) | 21 | 0.90 |
| ***Hemibagrus spilopterus* (JQ343983)** | | | | | | | | | | | |
| Codon | Count | RSCU | Codon | Count | RSCU | Codon | Count | RSCU | Codon | Count | RSCU |
| UUU(F) | 97 | 1.43 | UCU(S) | 53 | 0.92 | UAU(Y) | 122 | 1.12 | UGU(C) | 55 | 1.05 |
| UUC(F) | 39 | 0.57 | UCC(S) | 57 | 0.99 | UAC(Y) | 95 | 0.88 | UGC(C) | 50 | 0.95 |
| UUA(L) | 90 | 1.25 | UCA(S) | 61 | 1.05 | UAA(*) | 80 | 1.22 | UGA(*) | 64 | 0.98 |
| UUG(L) | 27 | 0.37 | UCG(S) | 25 | 0.43 | UAG(*) | 52 | 0.80 | UGG(W) | 54 | 1.00 |
| CUU(L) | 98 | 1.36 | CCU(P) | 119 | 1.36 | CAU(H) | 90 | 0.98 | CGU(R) | 28 | 0.70 |
| CUC(L) | 77 | 1.07 | CCC(P) | 89 | 1.02 | CAC(H) | 94 | 1.02 | CGC(R) | 42 | 1.05 |
| CUA(L) | 98 | 1.36 | CCA(P) | 114 | 1.30 | CAA(Q) | 89 | 1.55 | CGA(R) | 34 | 0.85 |
| CUG(L) | 43 | 0.60 | CCG(P) | 28 | 0.32 | CAG(Q) | 26 | 0.45 | CGG(R) | 31 | 0.78 |
| AUU(I) | 150 | 1.50 | ACU(T) | 108 | 1.51 | AAU(N) | 136 | 1.18 | AGU(S) | 57 | 0.99 |
| AUC(I) | 65 | 0.65 | ACC(T) | 78 | 1.09 | AAC(N) | 95 | 0.82 | AGC(S) | 94 | 1.63 |
| AUA(I) | 86 | 0.86 | ACA(T) | 80 | 1.12 | AAA(K) | 91 | 1.65 | AGA(R) | 46 | 1.15 |
| AUG(M) | 44 | 1.00 | ACG(T) | 20 | 0.28 | AAG(K) | 19 | 0.35 | AGG(R) | 59 | 1.48 |
| GUU(V) | 29 | 1.29 | GCU(A) | 30 | 0.91 | GAU(D) | 19 | 0.81 | GGU(G) | 26 | 0.87 |
| GUC(V) | 22 | 0.98 | GCC(A) | 57 | 1.73 | GAC(D) | 28 | 1.19 | GGC(G) | 43 | 1.45 |
| GUA(V) | 26 | 1.16 | GCA(A) | 34 | 1.03 | GAA(E) | 45 | 1.58 | GGA(G) | 29 | 0.97 |
| GUG(V) | 13 | 0.58 | GCG(A) | 11 | 0.33 | GAG(E) | 12 | 0.42 | GGG(G) | 21 | 0.71 |
| ***Hemibagrus wyckioides* (KJ624624)** | | | | | | | | | | | |
| Codon | Count | RSCU | Codon | Count | RSCU | Codon | Count | RSCU | Codon | Count | RSCU |
| UUU(F) | 94 | 1.40 | UCU(S) | 57 | 0.96 | UAU(Y) | 125 | 1.12 | UGU(C) | 55 | 1.02 |
| UUC(F) | 40 | 0.60 | UCC(S) | 60 | 1.01 | UAC(Y) | 98 | 0.88 | UGC(C) | 53 | 0.98 |
| UUA(L) | 79 | 1.09 | UCA(S) | 70 | 1.17 | UAA(*) | 82 | 1.29 | UGA(*) | 60 | 0.94 |
| UUG(L) | 32 | 0.44 | UCG(S) | 20 | 0.34 | UAG(*) | 49 | 0.77 | UGG(W) | 56 | 1.00 |
| CUU(L) | 100 | 1.38 | CCU(P) | 110 | 1.30 | CAU(H) | 72 | 0.85 | CGU(R) | 31 | 0.78 |
| CUC(L) | 77 | 1.06 | CCC(P) | 89 | 1.05 | CAC(H) | 97 | 1.15 | CGC(R) | 42 | 1.05 |
| CUA(L) | 103 | 1.42 | CCA(P) | 107 | 1.27 | CAA(Q) | 90 | 1.54 | CGA(R) | 38 | 0.95 |
| CUG(L) | 44 | 0.61 | CCG(P) | 32 | 0.38 | CAG(Q) | 27 | 0.46 | CGG(R) | 28 | 0.70 |
| AUU(I) | 153 | 1.56 | ACU(T) | 105 | 1.49 | AAU(N) | 142 | 1.20 | AGU(S) | 59 | 0.99 |
| AUC(I) | 63 | 0.64 | ACC(T) | 76 | 1.08 | AAC(N) | 95 | 0.80 | AGC(S) | 92 | 1.54 |
| AUA(I) | 79 | 0.80 | ACA(T) | 80 | 1.14 | AAA(K) | 89 | 1.65 | AGA(R) | 43 | 1.07 |
| AUG(M) | 47 | 1.00 | ACG(T) | 20 | 0.28 | AAG(K) | 19 | 0.35 | AGG(R) | 58 | 1.45 |
| GUU(V) | 29 | 1.29 | GCU(A) | 34 | 0.99 | GAU(D) | 16 | 0.67 | GGU(G) | 27 | 0.88 |
| GUC(V) | 21 | 0.93 | GCC(A) | 58 | 1.68 | GAC(D) | 32 | 1.33 | GGC(G) | 40 | 1.30 |
| GUA(V) | 27 | 1.20 | GCA(A) | 36 | 1.04 | GAA(E) | 45 | 1.55 | GGA(G) | 34 | 1.11 |
| GUG(V) | 13 | 0.58 | GCG(A) | 10 | 0.29 | GAG(E) | 13 | 0.45 | GGG(G) | 22 | 0.72 |

**Supplementary Table 7.** Comparative overview of anticodons identified in the tRNA genes across the mitogenomes of *Hemibagrus* species.

| **Genes** | ***H. velox* (PP922174)** | ***H. nemurus* (KM454860)** | ***H. guttatus* (KJ458934)** | ***H. macropterus* (JF834542)** |
| --- | --- | --- | --- | --- |
| *tRNA-Phe (F)* | GAA | GAA | GAA | GAA |
| *tRNA-Val (V)* | TAC | TAC | TAC | TAC |
| *tRNA-Leu (L2)* | TAA | TAA | TAA | TAA |
| *tRNA-Ile (I)* | GAT | GAT | GAT | GAT |
| *tRNA-Gln (Q)* | TTG | TTG | TTG | TTG |
| *tRNA-Met (M)* | CAT | CAT | CAT | CAT |
| *tRNA-Trp (W)* | TCA | TCA | TCA | TCA |
| *tRNA-Ala (A)* | TGC | TGC | TGC | TGC |
| *tRNA-Asn (N)* | GTT | GTT | GTT | GTT |
| *tRNA-Cys (C)* | GCA | GCA | GCA | GCA |
| *tRNA-Tyr (Y)* | GTA | GTA | GTA | GTA |
| *tRNA-Ser (S2)* | TGA | TGA | TGA | TGA |
| *tRNA-Asp (D)* | GTC | GTC | GTC | GTC |
| *tRNA-Lys (K)* | TTT | TTT | TTT | TTT |
| *tRNA-Gly (G)* | TCC | TCC | TCC | TCC |
| *tRNA-Arg (R)* | TCG | TCG | TCG | TCG |
| *tRNA-His (H)* | GTG | GTG | GTG | GTG |
| *tRNA-Ser (S1)* | GCT | GCT | GCT | GCT |
| *tRNA-Leu (L1)* | TAG | TAG | TAG | TAG |
| *tRNA-Glu (E)* | TTC | TTC | TTC | TTC |
| *tRNA-Thr (T)* | TGT | TGT | TGT | TGT |
| *tRNA-Pro (P)* | TGG | TGG | TGG | TGG |
| **Genes** | ***H. pluriradiatus* (PQ846023)** | ***H. punctatus* (OR759762)** | ***H. spilopterus* (JQ343983)** | ***H. wyckioides* (KJ624624)** |
| *tRNA-Phe (F)* | GAA | GAA | GAA | GAA |
| *tRNA-Val (V)* | TAC | TAC | TAC | TAC |
| *tRNA-Leu (L2)* | TAA | TAA | TAA | TAA |
| *tRNA-Ile (I)* | GAT | GAT | GAT | GAT |
| *tRNA-Gln (Q)* | TTG | TTG | TTG | TTG |
| *tRNA-Met (M)* | CAT | CAT | CAT | CAT |
| *tRNA-Trp (W)* | TCA | TCA | TCA | TCA |
| *tRNA-Ala (A)* | TGC | TGC | TGC | TGC |
| *tRNA-Asn (N)* | GTT | GTT | GTT | GTT |
| *tRNA-Cys (C)* | GCA | GCA | GCA | GCA |
| *tRNA-Tyr (Y)* | GTA | GTA | GTA | GTA |
| *tRNA-Ser (S2)* | TGA | TGA | TGA | TGC |
| *tRNA-Asp (D)* | GTC | GTC | GTC | GTC |
| *tRNA-Lys (K)* | TTT | TTT | TTT | TTT |
| *tRNA-Gly (G)* | TCC | TCC | TCC | TCC |
| *tRNA-Arg (R)* | TCG | TCG | TCG | TCG |
| *tRNA-His (H)* | GTG | GTG | GTG | GTG |
| *tRNA-Ser (S1)* | GCT | GCT | GCT | GCT |
| *tRNA-Leu (L1)* | TAG | TAG | TAG | TAG |
| *tRNA-Glu (E)* | TTC | TTC | TTC | TTC |
| *tRNA-Thr (T)* | TGT | TGT | TGT | TGT |
| *tRNA-Pro (P)* | TGG | TGG | TGG | TGG |
